# Supplementary material
Source: PubMed Central journal article supplement (PMC3079420)

## Summary of allograft outcome in the "RI alone" group

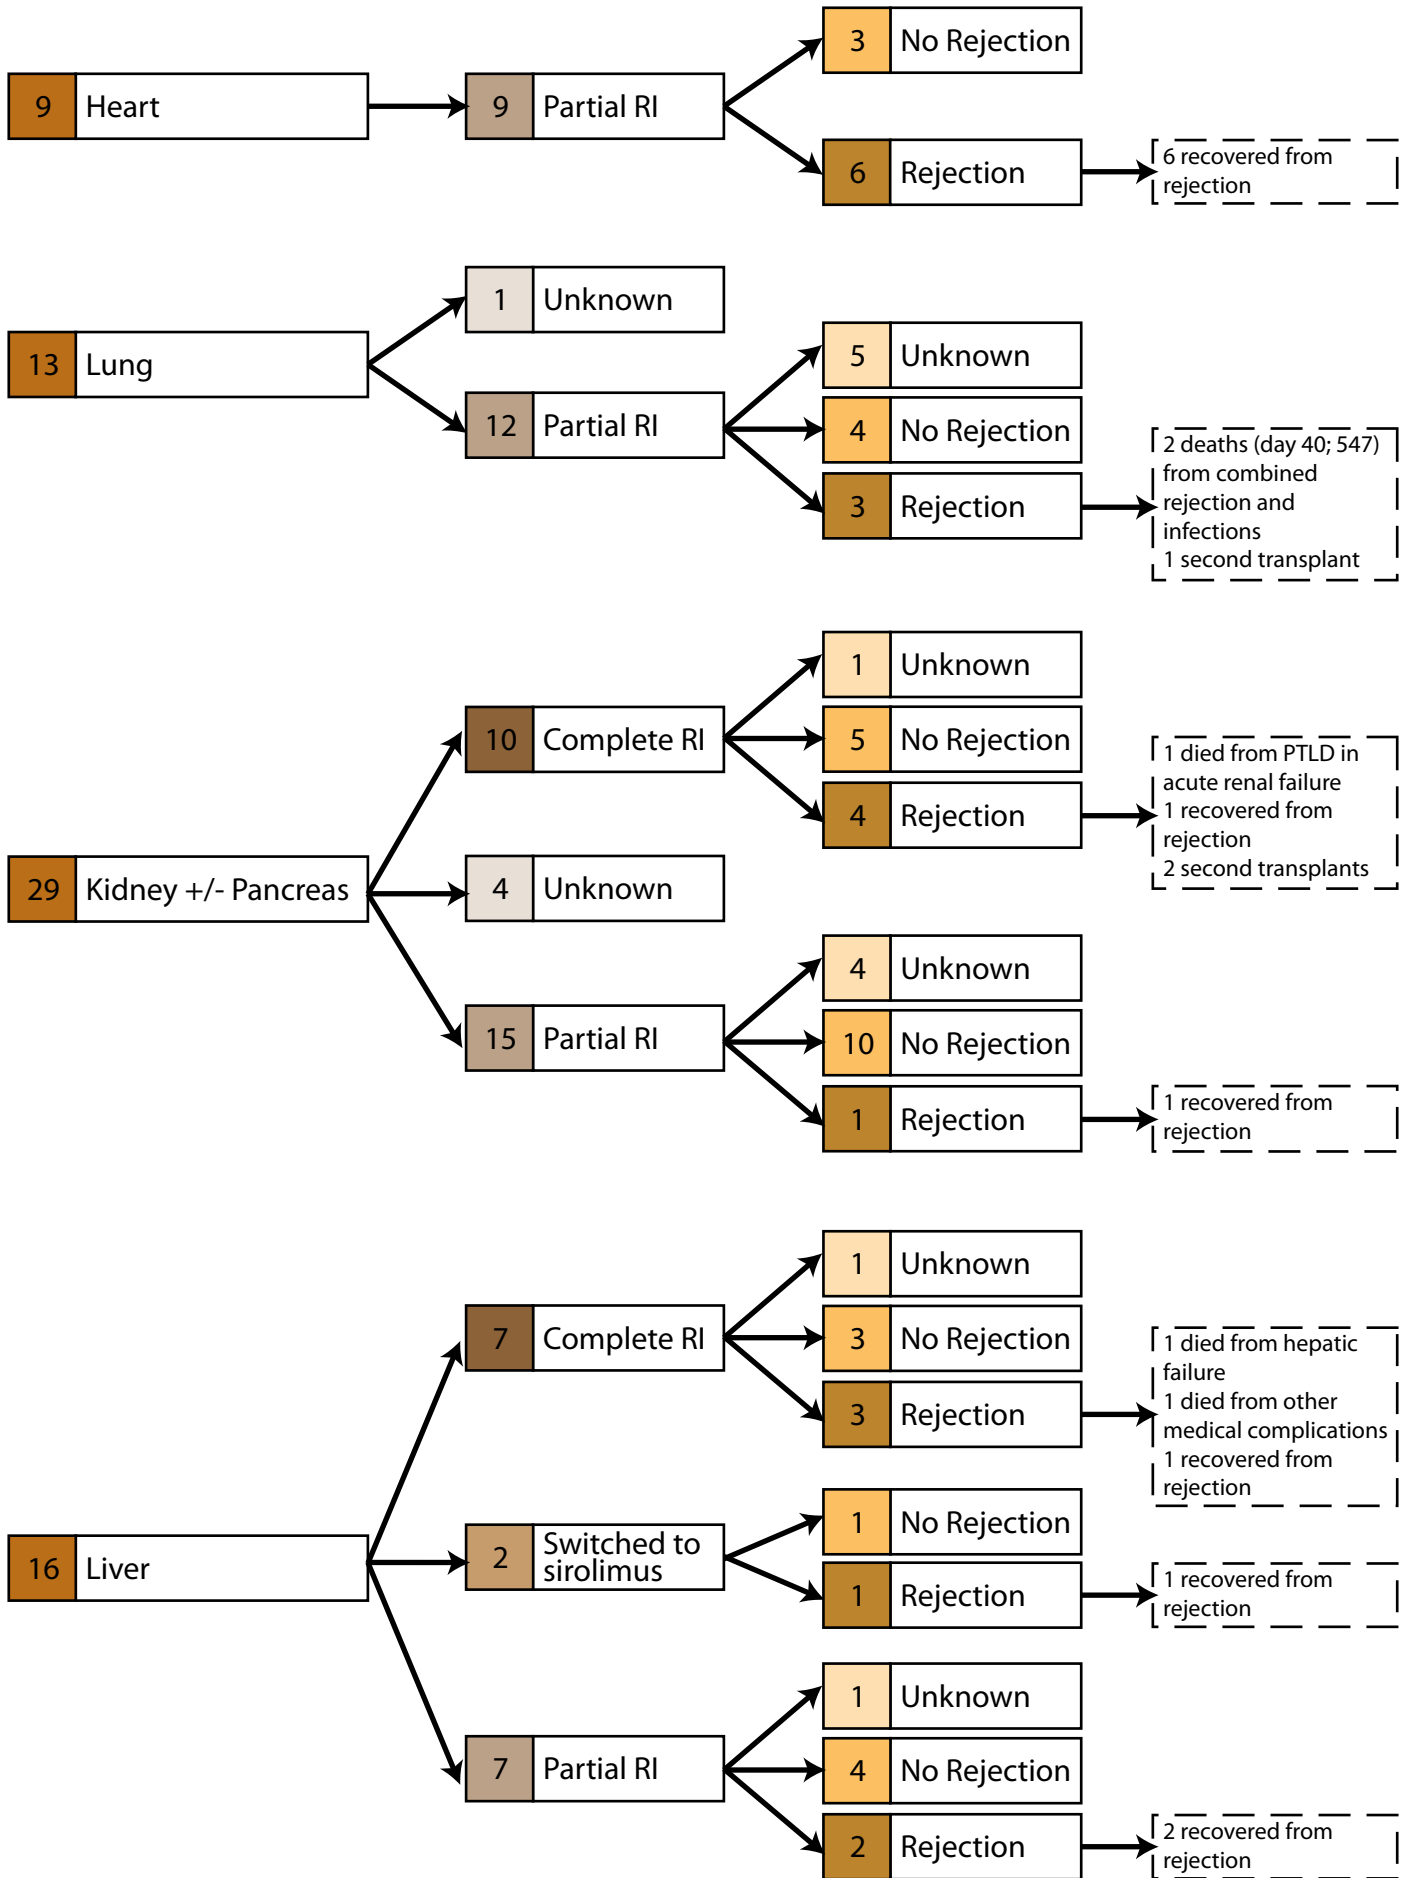

Supplement: NIHMS258126-supplement-Supp_Figure_S1.pdf [file NIHMS258126-supplement-Supp_Figure_S1.pdf]
